# Supplementary material
Source: Springer Nature journal article supplement (https://www.springermedizin.de/resource/supplementary/12889_2010_2860_MOESM1_ESM.pdf/9487478)

## Development of Public Health Informatics

## Development of Design Methods

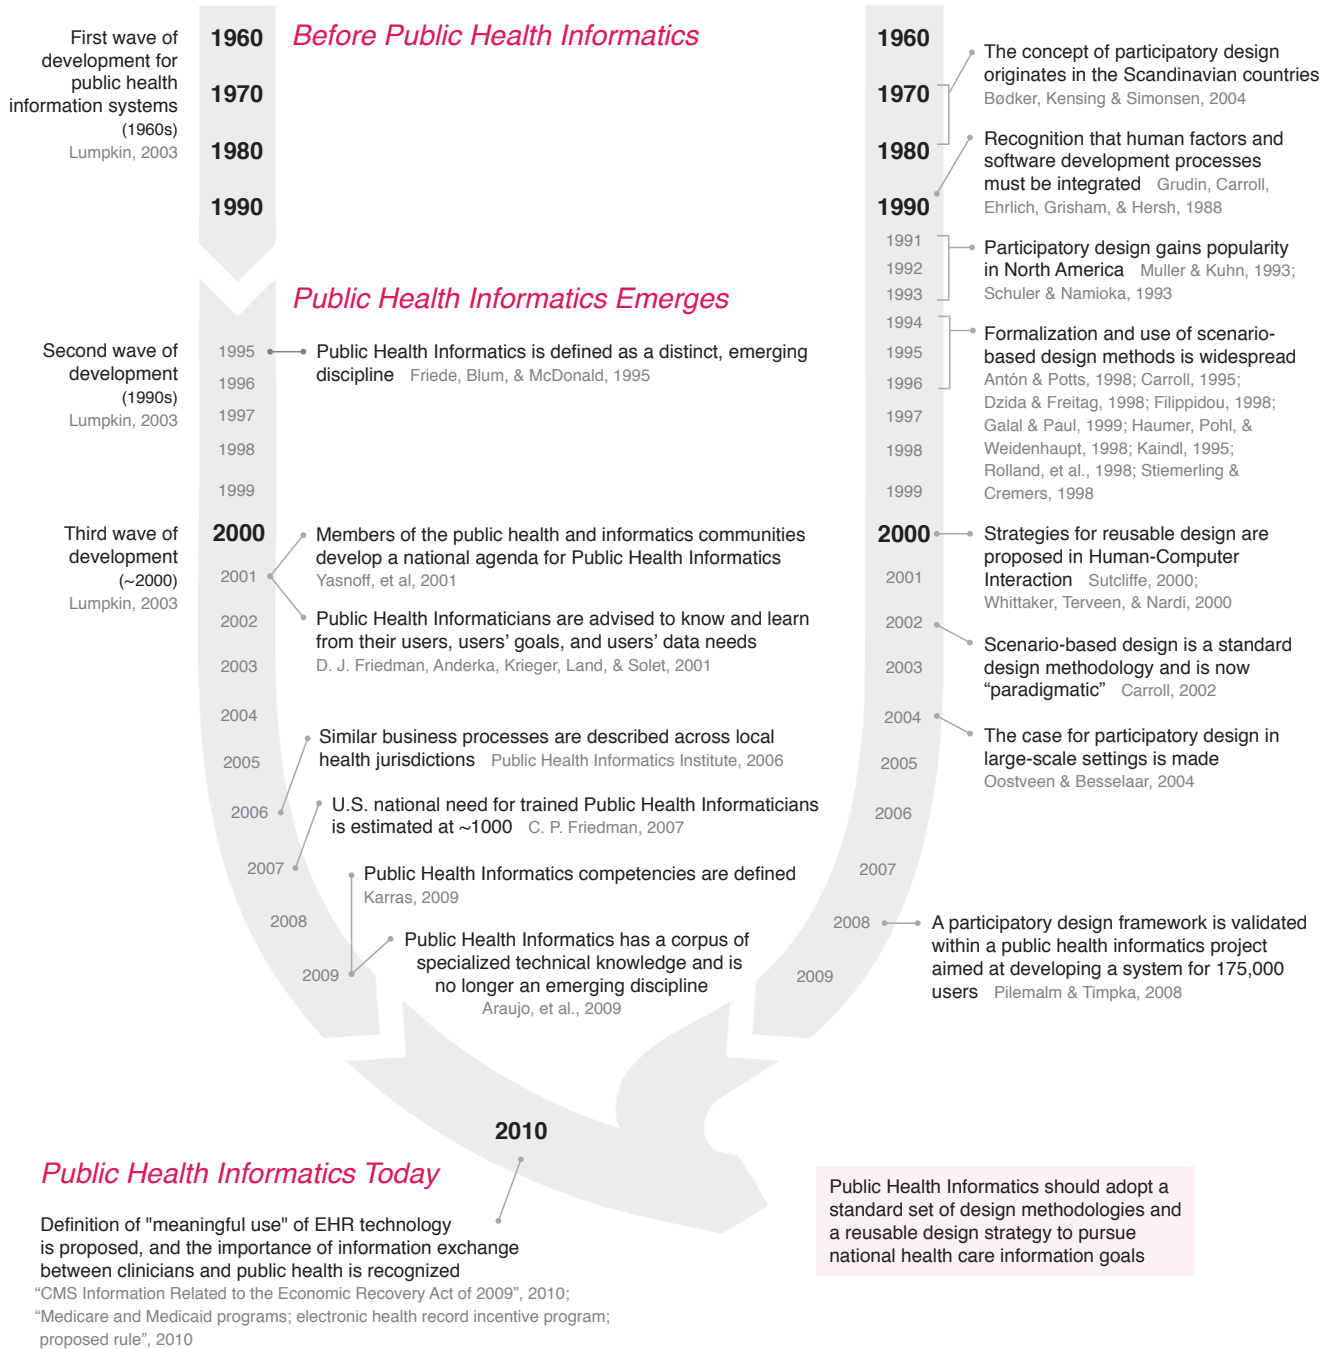

Supplement: MOESM1 [file 9487478]
